# Supplementary material for: Frequency of TERT Promoter Mutations in Real-World Analysis of 2,092 Thyroid Carcinoma Patients
Source: PubMed Central journal article supplement — Endocrinol Metab (Seoul). 2022 Jul 22;37(4):652–63. doi: 10.3803/EnM.2022.1477 (PMC9449103; doi:10.3803/enm.2022.1477), 2022-07-22
Supplement: enm-2022-1477-suppl1.pdf [file enm-2022-1477-suppl1.pdf]

**Supplemental Table S1.** Histological Subtypes of 2,020 Papillary Thyroid Carcinoma Patients

| Papillary thyroid carcinoma                         | Mutation-type<br>(n=57) | Wild-type<br>(n=1,963) | Proportion of<br><i>TERT</i> promoter<br>mutation, % |
|-----------------------------------------------------|-------------------------|------------------------|------------------------------------------------------|
| Classic                                             | 37                      | 1,486                  | 2.5                                                  |
| Tall cell variant/Classic with<br>tall cell feature | 12                      | 156                    | 7.6                                                  |
| Follicular variant                                  | 6                       | 247                    | 2.4                                                  |
| Solid variant                                       | 1                       | 3                      | 33.3                                                 |
| Columnar variant                                    | 1                       | 0                      | 100.0                                                |
| Cribiform-morular variant                           | 0                       | 2                      | 0                                                    |
| Diffuse sclerosing variant                          | 0                       | 47                     | 0                                                    |
| Hobnail variant                                     | 0                       | 4                      | 0                                                    |
| Oncocytic variant                                   | 0                       | 8                      | 0                                                    |
| Warthin-like variant                                | 0                       | 10                     | 0                                                    |

*TERT*, telomerase reverse transcriptase.
