# Supplementary material for: Frequency of TERT Promoter Mutations in Real-World Analysis of 2,092 Thyroid Carcinoma Patients
Source: PubMed Central journal article supplement — Endocrinol Metab (Seoul). 2022 Jul 22;37(4):652–63. doi: 10.3803/EnM.2022.1477 (PMC9449103; doi:10.3803/enm.2022.1477), 2022-07-22
Supplement: enm-2022-1477-suppl2.pdf [file enm-2022-1477-suppl2.pdf]

**Supplemental Table S2.** Histological Subtypes of Follicular Thyroid Carcinoma Patients, and Hurthle cell Thyroid Carcinoma Patients

| Variable                   | Follicular thyroid carcinoma |                     |                                                   | Hurthle cell thyroid carcinoma |                     |                                                   |
|----------------------------|------------------------------|---------------------|---------------------------------------------------|--------------------------------|---------------------|---------------------------------------------------|
|                            | Mutation-type<br>(n=7)       | Wild-type<br>(n=31) | Proportion of <i>TERT</i><br>promoter mutation, % | Mutation-type<br>(n=1)         | Wild-type<br>(n=13) | Proportion of <i>TERT</i><br>promoter mutation, % |
| Minimally invasive         | 3                            | 28                  | 9.7                                               | 0                              | 13                  | 0.0                                               |
| Encapsulated angioinvasive | 2                            | 3                   | 40.0                                              | 1                              | 0                   | 100.0                                             |
| Widely invasive            | 2                            | 0                   | 100.0                                             | 0                              | 0                   | 0.0                                               |

*TERT*, telomerase reverse transcriptase.
