# Supplementary material for: Frequency of TERT Promoter Mutations in Real-World Analysis of 2,092 Thyroid Carcinoma Patients
Source: PubMed Central journal article supplement — Endocrinol Metab (Seoul). 2022 Jul 22;37(4):652–63. doi: 10.3803/EnM.2022.1477 (PMC9449103; doi:10.3803/enm.2022.1477), 2022-07-22
Supplement: enm-2022-1477-suppl6.pdf [file enm-2022-1477-suppl6.pdf]

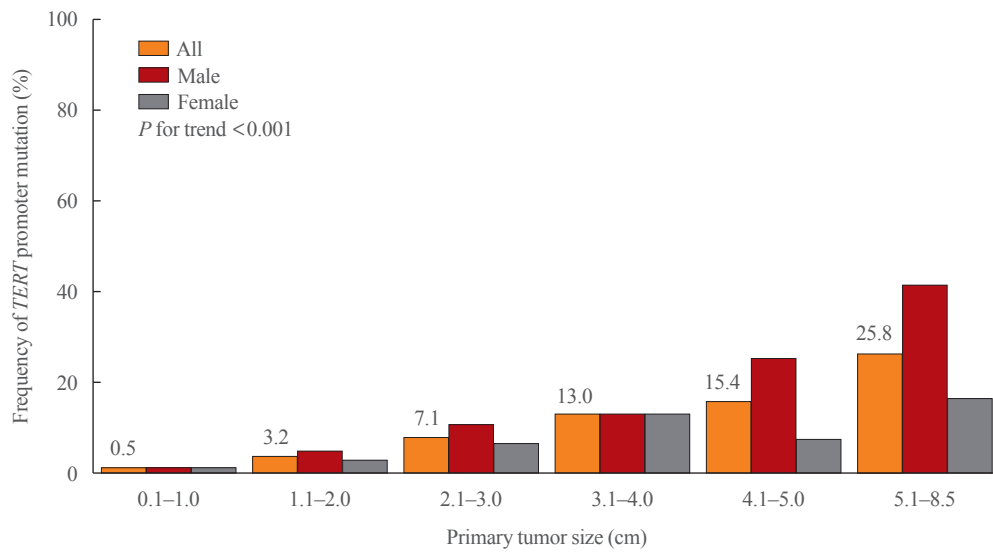

**Supplemental Fig. S2.** The frequency of telomerase reverse transcriptase (*TERT*) promoter mutations according to tumor size in 2,020 papillary thyroid carcinoma patients.
